# Supplementary material for: Optical and X-ray attenuation properties of hafnium oxide nanoparticles surface functionalized with fucoidan: toward the early diagnosis of atherothrombotic diseases
Source: Royal Society of Chemistry journal article supplement (doi:10.1039/d2ma01026g), 2023-01-01
Supplement: d2ma01026g1.pdf [file d2ma01026g1.pdf]

## Supporting Information

### Optical and X-ray attenuation properties of hafnium oxide nanoparticle surface functionalized with fucoidan: toward early diagnosis of atherothrombotic diseases

Yasmine Sebti<sup>a</sup>, Salim Si-Mohamed<sup>b,c</sup>, Rachida Aid<sup>a,d</sup>, Frederic Geinguenaud<sup>a</sup>, Mohand Chahal<sup>e</sup>, Yoann Lalatonne<sup>a,f</sup>, Frederic Chaubet<sup>a</sup>, Phalla Ou<sup>a,g</sup> and Laurence Motte<sup>a\*</sup>

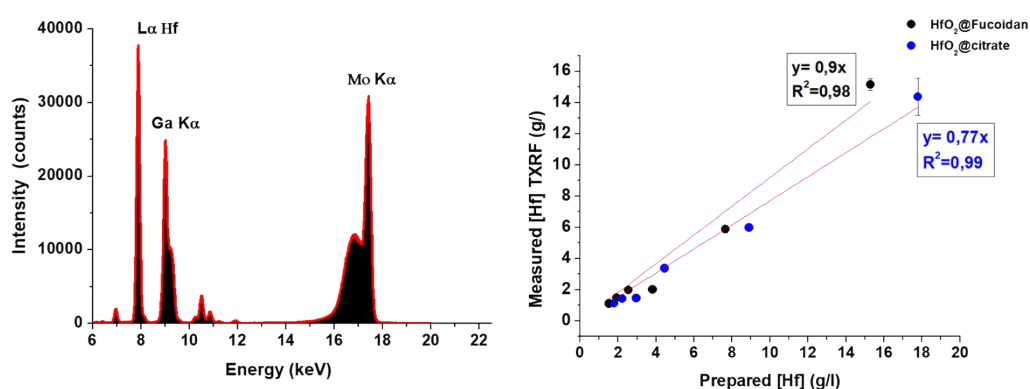

**Figure SI. 1** Representative TXRF spectrum for HfO<sub>2</sub> NP sample and corresponding calibration curves for HfO<sub>2</sub>@Fucoidan NPs (black spots) and HfO<sub>2</sub>@citrate NPs (blue spots).

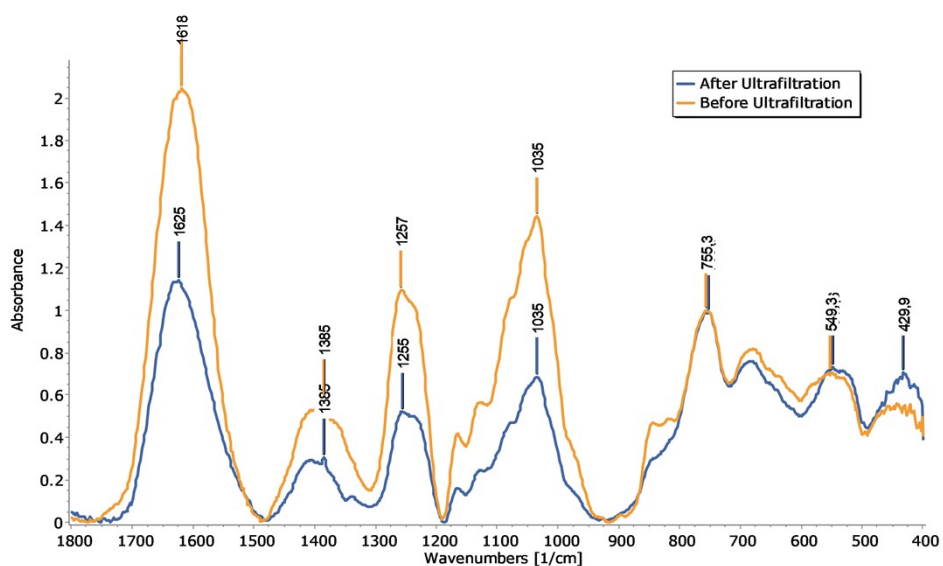

**Figure SI. 2:** FTIR spectra of HfO<sub>2</sub>@Fucoidan NPs at the saturated ratio R=14 before and after ultrafiltration

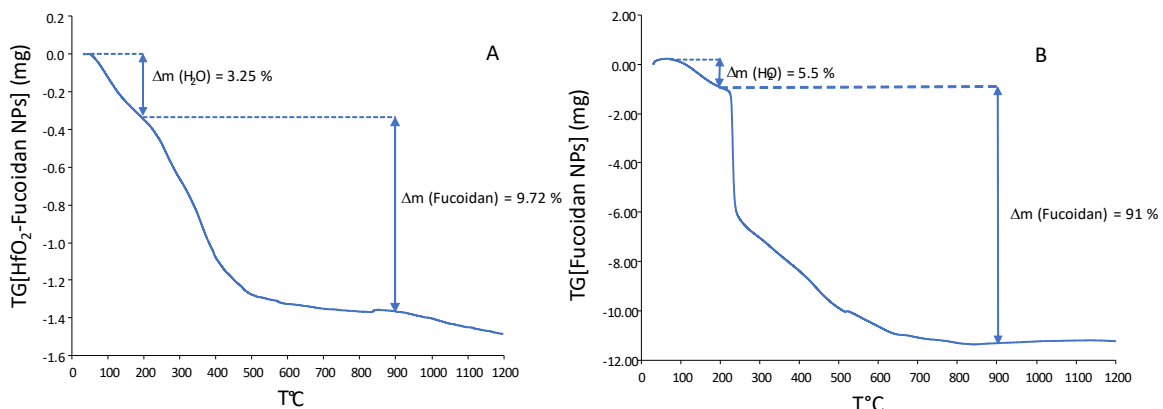

**Fig SI. 3:** Representative TGA Thermograms. Left :  $\text{HfO}_2$ @Fucoidan NPs; Right : Fucoidan

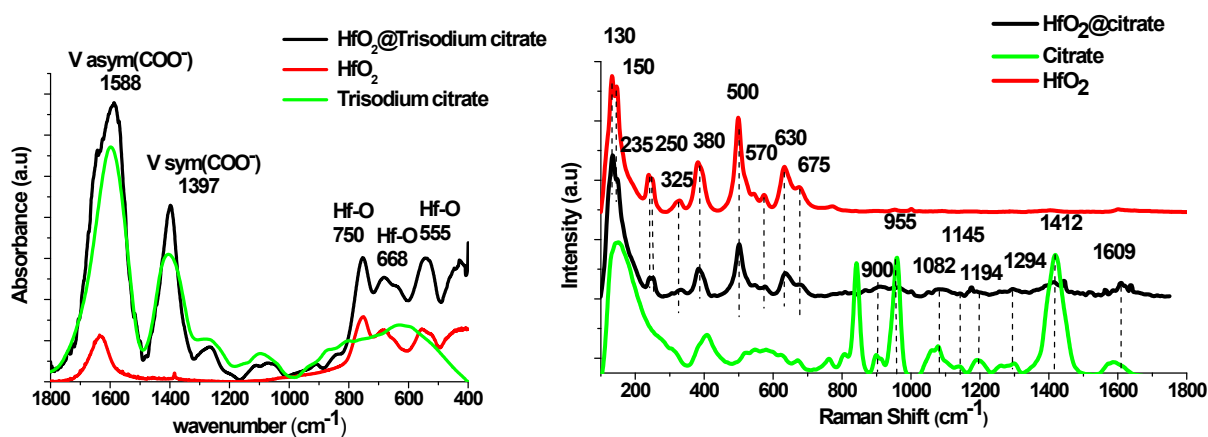

**Fig SI. 4:** FTIR (A) and Raman(B) spectra of  $\text{HfO}_2$  NPs (red curve), citrate (green curve) and  $\text{HfO}_2$ @citrate NPs (black curve)

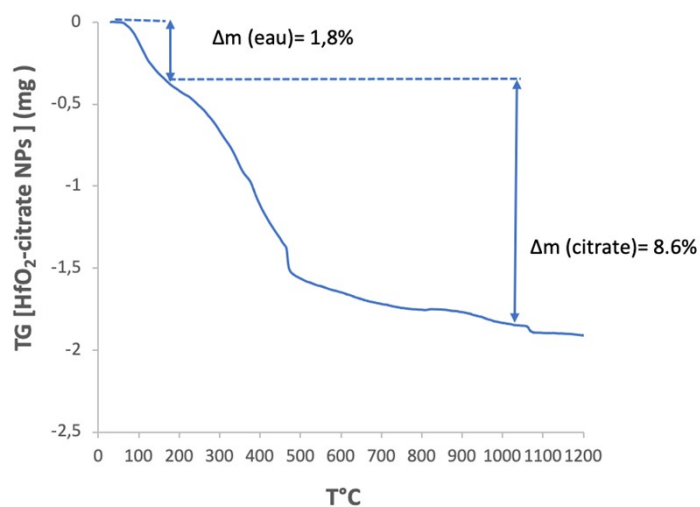

**Fig SI. 5:** Representative TGA Thermograms of  $\text{HfO}_2$ @citrate.

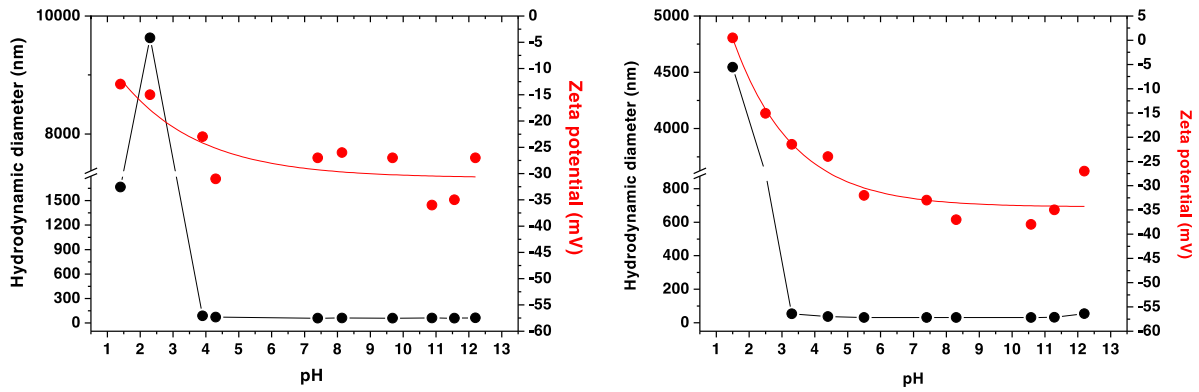

**Fig SI. 6:** pH stability Left : HfO<sub>2</sub>@fucoidan; Right : HfO<sub>2</sub>@ citrate

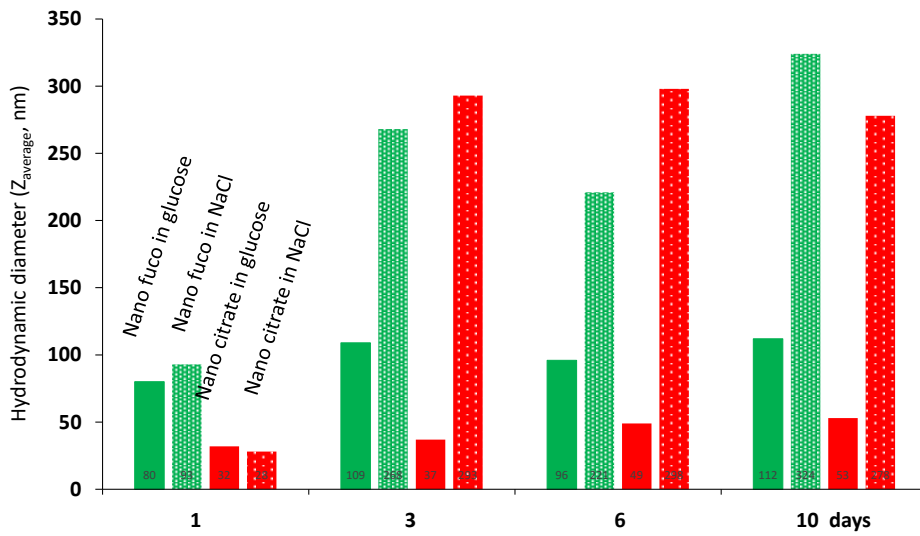

**Fig. SI. 7:** Stability of HfO<sub>2</sub> NPs@Fuco (green) and HfO<sub>2</sub>@citrate (red) in glucose 5% and NaCl 0.9% during 1, 3, 6, and 10 days.

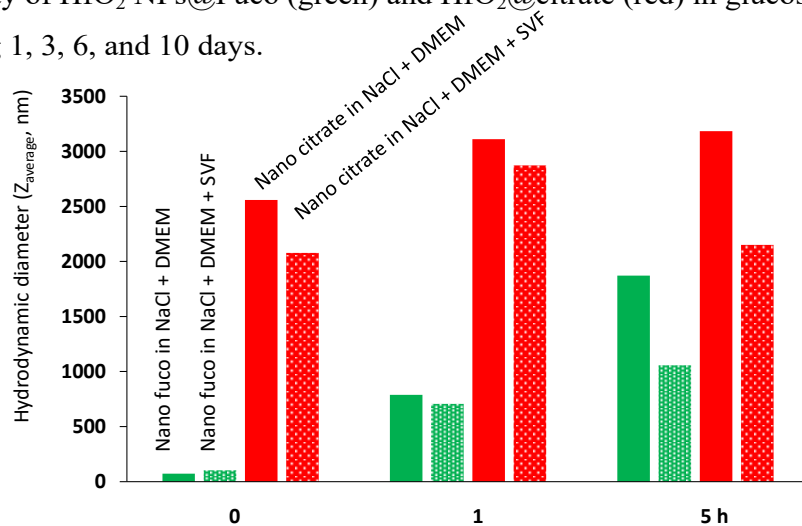

**Fig. SI. 8:** Stability of HfO<sub>2</sub> NPs@Fuco (green) and HfO<sub>2</sub>@citrate (red) in DMEM and DMEM+ 10% FBS followed at different time point : 0h, 1h and 5h.

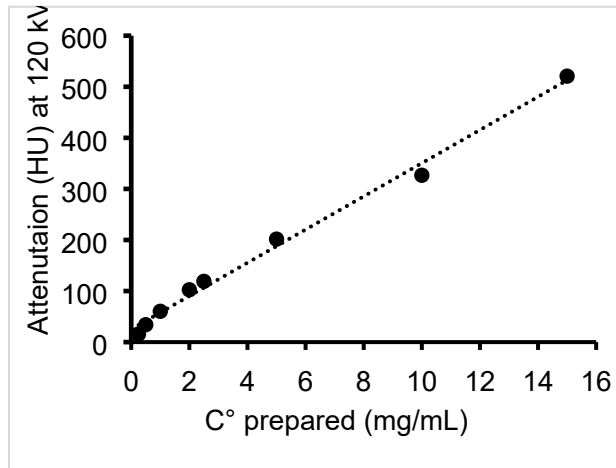

**Fig. SI. 9:** Attenuation rate measured with SPCCT system for commercial gadolinium based molecular agent: DOTAREM® (gadoterate meglumine; Guerbet, Villepinte, France).
